# Supplementary material
Source: Springer Nature journal article supplement (https://www.springermedizin.de/resource/supplementary/12879_2009_1131_MOESM1_ESM.pdf/9441924)

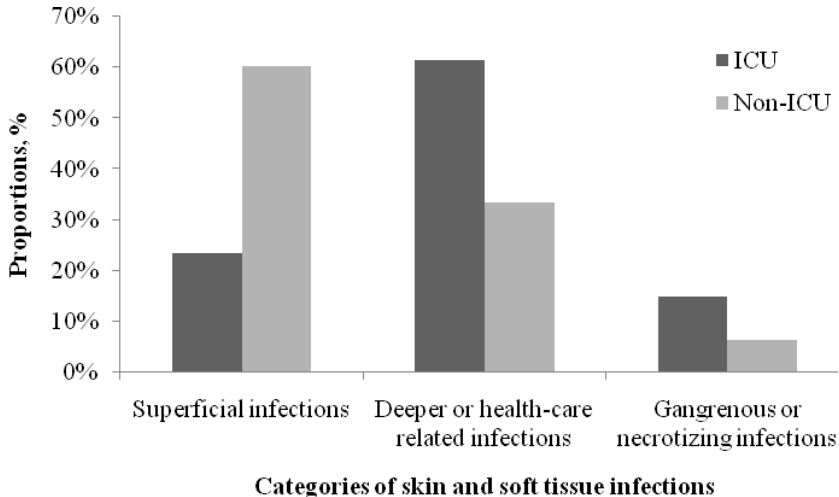

Supplement: MOESM1 [file 9441924]
